# Supplementary material
Source: MDPI journal article supplement (https://www.mdpi.com/2227-9717/11/1/153)
Supplement: s1 [file s1]

## Supplementary Material

### Effect of hop $\beta$ -acids extract supplementation on the volatile compound profile of roasted chicken meat

Larissa Chirino de Almeida<sup>1</sup>, Mirella Romanelli Vicente Bertolo<sup>1</sup>, Daniel Rodrigues Cardoso<sup>1</sup>, Stanislaw Bogusz, Junior

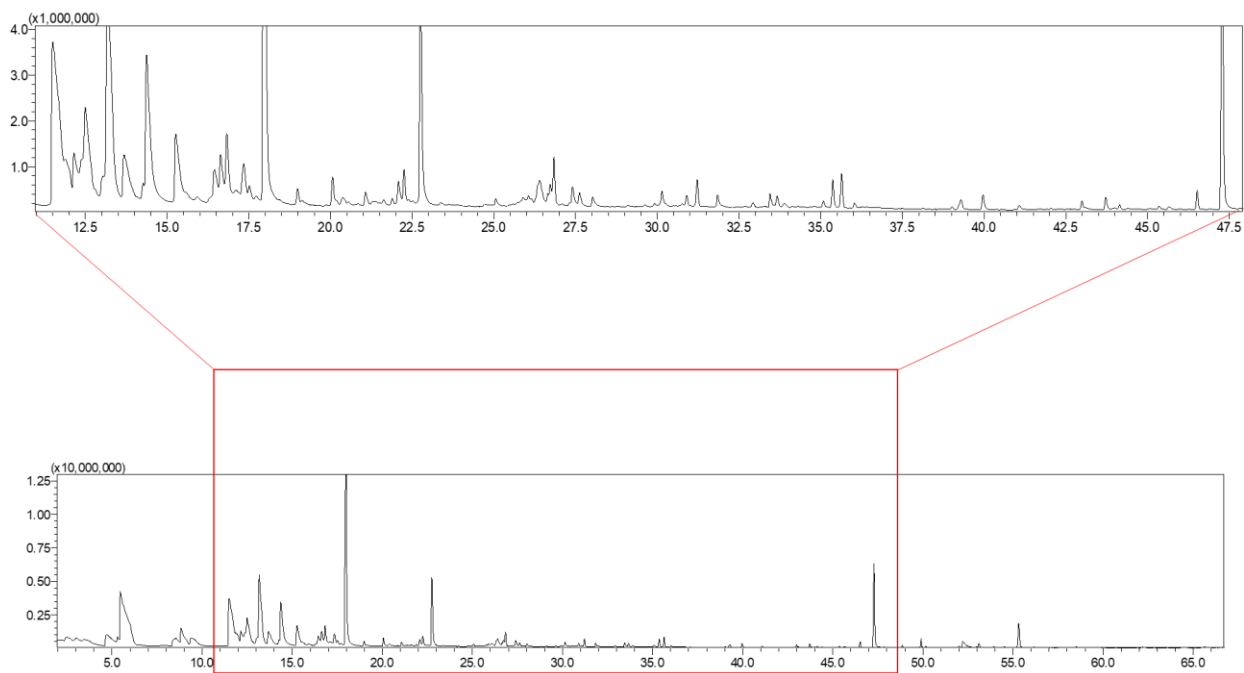

**Figure 1S.** Chromatogram of volatiles identified by HS-SPME and GC-MS in roasted chicken meat supplemented with 30 mg kg<sup>-1</sup> of hop  $\beta$ -acids, expanding the chromatogram from 11 to 47.5 min.
